# Supplementary material for: Colonization of Extramammary Sites with Mastitis-Associated S. aureus Strains in Dairy Goats
Source: MDPI journal article supplement (doi:10.3390/pathogens12040515), 2023-03-26
Supplement: s1 [file s1]

**Supplementary Table S1:** Overview of milk and extramammary body sites colonized with *S. aureus* and the *spa* genotypes identified from these sites in a Dutch dairy goat herd.

| Animal ID | Milk           | Nares      | Vulva | Hock         | Groin | Udder cleft |
|-----------|----------------|------------|-------|--------------|-------|-------------|
| 1         | - <sup>1</sup> | t544       | -     | -            | -     | -           |
| 2         | -              | t544       | -     | -            | -     | -           |
| 3         | -              | t544/t1236 | -     | -            | -     | -           |
| 5         | -              | t544       | -     | -            | -     | -           |
| 6         | -              | t544       | -     | -            | -     | -           |
| 8         | -              | t1236      | -     | -            | -     | -           |
| 9         | -              | t544       | -     | t1236        | -     | t1236       |
| 10        | -              | t1236      | -     | -            | -     | -           |
| 11        | -              | t544       | t544  | -            | -     | -           |
| 12        | -              | t544       | -     | -            | -     | -           |
| 14        | -              | t544       | -     | -            | -     | -           |
| 15        | -              | t544       | -     | -            | -     | -           |
| 16        | -              | -          | t1236 | -            | -     | -           |
| 17        | -              | t544       | -     | -            | -     | -           |
| 18        | -              | t544       | -     | -            | -     | -           |
| 19        | -              | t544       | -     | -            | -     | -           |
| 21        | -              | t544       | -     | -            | -     | -           |
| 25        | -              | -          | t426  | Non-typeable | -     | -           |
| 26        | -              | t1236      | -     | -            | t1236 | -           |
| 27        | -              | t1236      | -     | -            | -     | -           |
| 28        | -              | t426       | -     | -            | -     | -           |
| 31        | -              | t1236      | -     | -            | -     | t544        |
| 32        | -              | t544       | -     | -            | -     | -           |
| 33        | -              | -          | t544  | -            | -     | -           |
| 34        | -              | t544       | -     | -            | -     | t544        |
| 37        | -              | t544       | -     | -            | -     | -           |
| 39        | -              | t544       | -     | -            | -     | -           |
| 41        | -              | t544       | -     | -            | t544  | -           |
| 43        | -              | t544       | -     | -            | -     | -           |
| 44        | -              | t544       | -     | -            | -     | -           |
| 45        | -              | t544       | -     | t544         | -     | -           |
| 47        | -              | t544       | -     | -            | -     | -           |
| 49        | -              | t1236      | -     | -            | -     | -           |
| 50        | -              | t544       | -     | t544         | -     | -           |
| 51        | t544           | t544       | -     | -            | -     | -           |
| 53        | -              | -          | -     | t544         | -     | -           |
| 55        | -              | t1236      | -     | -            | -     | -           |
| 56        | -              | -          | -     | t544         | -     | -           |
| 59        | -              | t544       | -     | -            | -     | -           |
| 60        | t544           | t544       | -     | t544         | -     | -           |
| 68        | -              | t544       | -     | -            | -     | -           |
| 69        | -              | t544       | -     | -            | -     | -           |
| 70        | -              | -          | t544  | -            | -     | -           |
| 71        | -              | -          | -     | -            | -     | t544        |

|                      |              |                   |      |      |      |      |
|----------------------|--------------|-------------------|------|------|------|------|
| 74                   | -            | t544/novel type 2 | -    | -    | -    | -    |
| 77                   | -            | t544              | -    | -    | -    | -    |
| 79                   | -            | t1236             | -    | -    | -    | -    |
| 81                   | -            | t1236             | t544 | t544 | -    | -    |
| 84                   | -            | -                 | -    | -    | -    | t544 |
| 85                   | -            | t544              | -    | -    | -    | -    |
| 86                   | -            | t544              | -    | -    | -    | -    |
| 88                   | -            | t544              | -    | -    | -    | -    |
| 89                   | -            | t544              | -    | -    | -    | -    |
| 90                   | -            | t544              | -    | -    | -    | t544 |
| 100                  | -            | t544              | -    | -    | -    | -    |
| 101                  | -            | t1236             | -    | -    | t544 | t544 |
| 103                  | -            | t544              | -    | -    | -    | -    |
| 104                  | -            | t544              | -    | -    | -    | -    |
| 112                  | -            | t1236             | -    | -    | -    | -    |
| 114                  | -            | t544              | -    | -    | -    | -    |
| 117                  | -            | t544/t3992        | -    | -    | -    | -    |
| 120                  | t544         | t544              | -    | -    | -    | -    |
| ET33236 <sup>2</sup> | t544         |                   |      |      |      |      |
| ET33249              | Novel type 1 |                   |      |      |      |      |
| ET33423              | t544         |                   |      |      |      |      |
| ET33113              | t1236        |                   |      |      |      |      |
| ET44423              | t1236        |                   |      |      |      |      |
| ET33274              | t544         |                   |      |      |      |      |
| ET44153              | t1236        |                   |      |      |      |      |
| ET33194              | t544         |                   |      |      |      |      |
| ET33111              | t426         |                   |      |      |      |      |
| ET55065              | t1236        |                   |      |      |      |      |
| ET44068              | t544         |                   |      |      |      |      |
| ET33029              | t1236        |                   |      |      |      |      |

---

<sup>1</sup> Culture negative for *S. aureus*.

<sup>2</sup> Animal ID numbers starting with ET are goats from which only milk samples were collected.
